# Supplementary material
Source: publisher figshare collection journal article supplement (https://acs.figshare.com/ndownloader/files/4393180)
Supplement: Supplementary file 1 [file 4393180]

# $\{\text{Mn}^{\text{II}}_9\text{W}^{\text{V}}_6\}_n$ Nanowires Organized into 3D Hybrid Network of $\text{I}^1\text{O}^2$ Topology

Robert Podgajny, Szymon Chorąży, Wojciech Nitek, Michał Rams, Maria Balanda and Barbara Sieklucka

## Supporting Information

### 1. Synthetic strategy

**Figure S1.** Synthetic strategy: possible bridging between  $\{\text{Mn}^{\text{II}}_9\text{W}^{\text{V}}_6\}$  clusters occurring *via* the substitution of labile solvent molecules at  $[\text{Mn}^{\text{II}}(\text{NC})_3(\text{MeOH})_3]^-$  units by: organic N-donor linker (a) or/and  $\text{CN}^-$  (b).

### 2. Experimental details

**Table S1.** Changes in the composition of **1** during drying on the air.

### 3. Crystal structure solution and refinement details

**Table S2.** Crystal data and structure refinement for **1**.

**Table S3.** Detailed structure parameters for **1**.

### 4. Crystal structure visualization

**Figure S2.** Detailed labeling schemes for **1**: first coordination spheres of Mn5, Mn6, Mn8 and W3 centers (a), first coordination spheres of Mn4, Mn7, W1 and W2 centers (b) and relative positions of metal ions in **1** (c).

**Figure S3.** Intercluster contacts between  $\{\text{Mn}_9\text{W}_6\}$  units.

### 5. Magnetic properties

**Figure S4.** *ac*  $\chi'(T)$  (a) and  $\chi''(T)$  (b) susceptibility curves for sample **1a** measured at  $H_{\text{ac}}=3$  Oe,  $f=10$  Hz.

## 1. Synthetic strategy

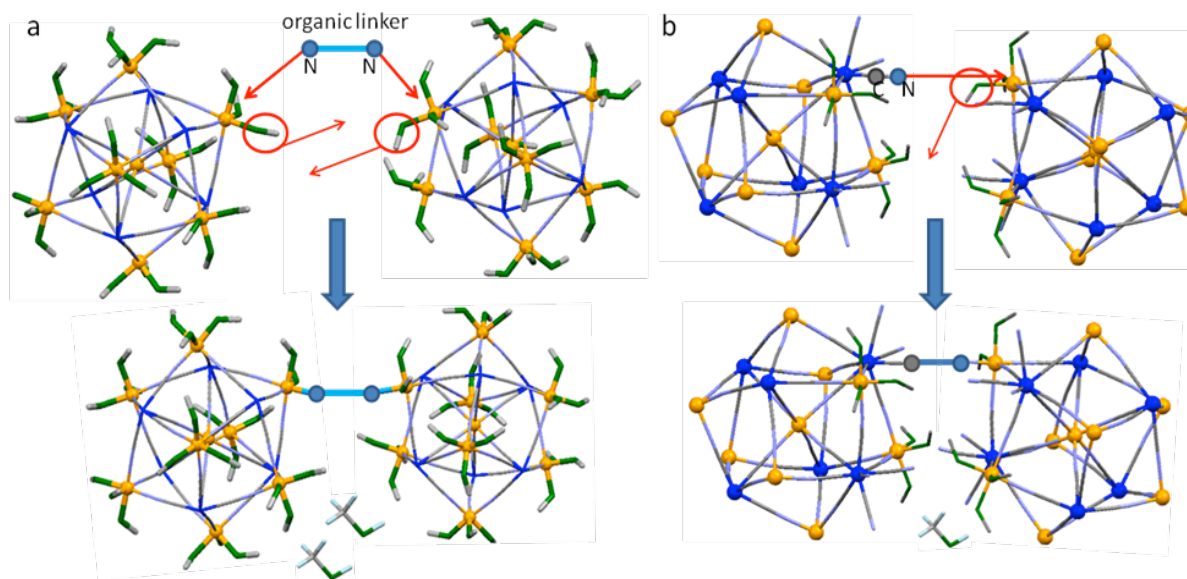

**Figure S1.** Synthetic strategy: possible bridging between  $\{\text{Mn}^{\text{II}}_9\text{W}^{\text{V}}_6\}$  clusters occurring *via* the substitution of labile solvent molecules at  $[\text{Mn}^{\text{II}}(\text{NC})_3(\text{MeOH})_3]^-$  units by: organic N-donor linker (a) or/and  $\text{CN}^-$  (b). Colors: Mn(II) centers (yellow), W(V) centers (dark blue), oxygen atoms of MeOH (green), carbon atoms (grey), nitrogen atoms (pale blue). Some terminal ligands are omitted for clarity. Atom spheres of intercluster bridges are enlarged. Red arrows show changes in coordination spheres during bridging.

## 2. Experimental details

### Materials

$\text{Mn}^{\text{II}}(\text{ClO}_4)_2 \cdot 6\text{H}_2\text{O}$ , 1,2-di(4-pyridyl)ethylene (dpe) and solvents used during the synthesis were purchased from commercial sources (Sigma Aldrich, Idalia) and used without further purification.  $\text{Na}_3[\text{W}(\text{CN})_8] \cdot 4\text{H}_2\text{O}$  was synthesized according to the published procedure.<sup>S1</sup>

(S1) Samotus, A. *Pol. J. Chem.* **1973**, 47, 653).

### Synthesis, composition and general properties of $\{\text{Mn}^{\text{II}}_9[\text{W}^{\text{V}}(\text{CN})_8]_6(\text{dpe})_5(\text{MeOH})_{10}\} \cdot 14\text{MeOH}$ , **1**

Different combinations of organic solvents including alcohols, acetone, acetonitrile, tetrahydrofuran, DMF and DMSO including also some amount of formic acid or acetic acid were used to conduct the self-assembly between  $\{\text{Mn}_9\text{W}_6\}$  clusters and dpe. The best quality crystals of **1** were obtained as follows. 45 mL of methanol, 45 mL of ethanol and 10 mL of acetonitrile were stirred together for several minutes to give solution **I**. A 0.15 mmol (80.4 mg) of  $\text{Na}_3[\text{W}(\text{CN})_8] \cdot 4\text{H}_2\text{O}$  with 0.225 mmol (81.4 mg) of  $\text{Mn}^{\text{II}}(\text{ClO}_4)_2 \cdot 6\text{H}_2\text{O}$  were dissolved in 6 mL of solution **I** to give light brown solution **II**. A 1.125 mmol (205 mg) of dpe was dissolved in 6 mL of solution **I** to give solution **III**. Solution **I** (*ca.* 1 mL) was put into one arm

and solution **II** (*ca.* 1 mL) was put into the other arm of 10 mL H-tube. Then the two arms were filled with solution **I**. After slow diffusion for about five weeks, orange blade crystals of **1** were formed. Both, washing crystals with solution **I** and removal the solvents lead to the breakdown of the crystals after few minutes. Resultant freshly dried powder  $\text{Mn}_6\text{W}_9(\text{dpe})_5(\text{MeOH})_{18}(\text{H}_2\text{O})_6$  **1a** was characterized by elementary analysis (Table S1) and IR spectroscopy. IR (KBr pellets) in  $\text{cm}^{-1}$ : 2170m, 2130m(sh),  $\nu(\text{C}\equiv\text{N})$ ; 1552w, 1504w, 1465vw, 1425m, 1350vw  $\text{cm}^{-1}$ ,  $\nu(\text{C}=\text{C})$  and  $\nu(\text{C}=\text{N})$ ; 1249w, 1220w, 1203w, 1067w, 975w, 960w, 828m, 800m,  $\gamma(\text{C}-\text{H})$  and aromatic ring deformations; 1610s,  $\delta(\text{H}_2\text{O})$ ; 1015m(sh),  $\nu(\text{C}-\text{O})$  (in MeOH); 552m, 465m, coordination. After 24 hours of exposition to the air  $\text{Mn}_6\text{W}_9(\text{dpe})_5(\text{H}_2\text{O})_{24}$  **1b** residue was obtained with water as only solvent in the structure. The process of exchange of MeOH to  $\text{H}_2\text{O}$  molecules was confirmed by IR spectra, where the increase of intensity of the bands related to water (especially 1610  $\text{cm}^{-1}$ ) and the vanishing of 1015  $\text{cm}^{-1}$  band related to methanol were observed. Two distinguishable bands 2170m, 2130m(sh)  $\text{cm}^{-1}$  confirm the presence of bridging  $\text{W}^{\text{V}}\text{-CN-Mn}$  and terminal  $\text{W}^{\text{V}}\text{-CN}$  coordination arrangements.<sup>S2</sup> The region characteristic for vibrations of organic molecules exhibits the set of bands assignable to the vibrations of dpe ligand. The composition of **1** was determined based on the X-ray diffraction measurements. The number of MeOH molecules in **1** and the effective molar mass has been estimated from the elemental analyses of **1a** and **1b**, assuming the total number of solvent molecules to be 24.

**Table S1.** Changes in the composition of **1** during drying on the air.

| Sample    | Composition established by                                                    | Experimental |      |      | General formula:<br>$\{\text{Mn}^{\text{II}}_9(\text{dpe})_3[\text{W}^{\text{V}}(\text{CN})_8]_6\}$<br>$\cdot x\text{MeOH}\cdot y\text{H}_2\text{O}$ |           | Calculated |      |      | Molar mass [g/mol] |
|-----------|-------------------------------------------------------------------------------|--------------|------|------|------------------------------------------------------------------------------------------------------------------------------------------------------|-----------|------------|------|------|--------------------|
|           |                                                                               | C[%]         | H[%] | N[%] | x                                                                                                                                                    | y         | C[%]       | H[%] | N[%] |                    |
| <b>1</b>  | X-ray diffraction, trend of the elemental analyses of <b>1a</b> and <b>1b</b> | -            | -    | -    | <b>24</b>                                                                                                                                            | <b>0</b>  | 35.0       | 3.2  | 17.9 | 4526               |
| <b>1a</b> | elemental analysis                                                            | 34.2         | 2.8  | 18.7 | <b>18</b>                                                                                                                                            | <b>6</b>  | 34.1       | 3.0  | 18.3 | 4442               |
| <b>1b</b> | elemental analysis                                                            | 30.9         | 2.1  | 18.9 | <b>0</b>                                                                                                                                             | <b>24</b> | 31.0       | 2.4  | 19.4 | 4190               |

(S2) Podgajny, R. at al, *Dalton Trans.* **2003**, 3458-3468

### Physical techniques

Elemental analyses (C, H, N) were performed using an EuroEA EuroVector elemental analyzer. Infrared spectra were measured in KBr pellets between 4000 and 400  $\text{cm}^{-1}$  using a Bruker EQUINOX 55 FT-IR spectrometer. Magnetic measurements were performed using Quantum Design SQUID magnetometer MPMS-XL. The sample of **1** was washed from the mother liquor, immersed in solution **I** and closed in a glass tube. Diamagnetic signal of components of solid **1** as well as 120mg of solution **I** was subtracted. The mass of **1** was estimated to be 23,5(0,5) mg. It was also confirmed by the value of magnetic signal measured at 298 K for sample **1a**. AC susceptibility measurements was made at  $H_{\text{ac}} = 3$  Oe, at frequencies 1-1000 Hz, down to 1.8 K.

### 3. Crystal structure solution and refinement

Due to low stability of crystals of **1** many preliminary X-ray diffraction measurements have been done. Three independent full data collection for the determination of the crystal structure of **1** has been performed. To prevent the escape of the solvent molecules from the crystal lattice, in two experiments single crystals were placed in a capillary in vapour of the mother liquor. In the third case a crystal was quickly removed from the mother solution and cooled to 100 K. In each case quality of collected data was weak. The resolution of the data was low, and the values of  $R_1$  and  $wR_2$  factors for the structure refinement were high. In all three cases the crystal structure models obtained from the solution of phase-problem were very similar. This suggests that the data and the model obtained can be considered as reliable. Finally, the data collected at low temperature were chosen for further calculation, as they were the most promising to give the correct model of crystal structure after refinement.

Diffraction data for single crystal were collected on a Nonius KappaCCD four circle diffractometer, equipped with a Mo (0.71073 Å)  $K\alpha$  radiation source, graphite monochromator and CryoStream system for measurements at low temperature. Cell refinement and data reduction was performed using HKL SCALEPAC and DENZO.<sup>S3</sup> Positions of most of non-hydrogen atoms were determined by direct methods using SIR-97.<sup>S4</sup> Non-hydrogen atoms missing in structure model were found on the difference electron density map during structure refinement. Tungsten and manganese atoms were refined anisotropically using weighted full-matrix least-squares on  $F^2$ . Other non-hydrogen atoms were refined with isotropic displacement parameters. Attempts to refine these atoms anisotropically makes the refinement process unstable. All hydrogen atoms were positioned with an idealized geometry and refined using a riding model. Refinement and further calculations were carried out using SHELXL-97.<sup>S5</sup> To maintain the correct geometry, selected cyanide groups and selected fragments of ligand molecules of dpe, *trans*-1,2-di(4-pyridyl)ethylene), were refined with restrained distances and angles. In one case, the aromatic ring of the dpe were refined as disordered, in two equally occupied positions. It should be noted that large cavities are present in the obtained model of the crystal structure of **1**. It seems obvious that this cavities are filled with molecules of mother liquor, but, determination of their positions is impossible with the diffraction data obtained.

(S3) Otwinowski, Z.; Minor, W. **1997**. *Methods in Enzymology*, Vol. 276, *Macromolecular Crystallography*, Part A, edited by C. W. Carter Jr & R. M. Sweet, pp. 307-326. New York: Academic Press.

(S4) Altomare, A.; Burla, M. C.; Camalli, M.; Cascarano, G. L., Giacovazzo, C.; Guagliardi, A.; Moliterni, A. G. G.; Polidori, G.; Spagna, R. *J. Appl. Cryst.* **1999**, 32, 115-119.

(S5) Sheldrick, G. M., *Acta Cryst.* **2008**, A64, 112-122.

(S6) Farrugia, L. J., *J. Appl. Cryst.* **1997**, 30, 565.

(S7) Farrugia, L. J., *J. Appl. Cryst.* **1999**, 32, 837-838.

## The checkcif comments

The checkcif alerts:

```
THETM01_ALERT_3_A  
PLAT201_ALERT_2_A  
PLAT220_ALERT_2_A  
PLAT220_ALERT_2_A  
PLAT602_ALERT_2_A  
DIFMX01_ALERT_2_B  
PLAT094_ALERT_2_B  
PLAT097_ALERT_2_B  
PLAT342_ALERT_3_B  
PLAT731_ALERT_1_B  
DIFMX02_ALERT_1_C  
RFACG01_ALERT_3_C  
RFACR01_ALERT_3_C  
PLAT029_ALERT_3_C  
PLAT082_ALERT_2_C  
PLAT084_ALERT_2_C
```

are a direct consequence of relatively weak quality of diffraction data and high degree of disorder, particularly in the space of crystallization solvent molecules.

The checkcif alerts PLAT241\_ALERT\_2 and PLAT242\_ALERT\_2 on levels A and B are typical for complexes with central metal ion and mobile organic ligands.

**Table S2** Crystal data and structure refinement for **1**

|                                   |                                                                                                 |
|-----------------------------------|-------------------------------------------------------------------------------------------------|
| Empirical formula                 | Mn <sub>9</sub> W <sub>6</sub> C <sub>108</sub> H <sub>50</sub> N <sub>58</sub> O <sub>10</sub> |
| Formula weight                    | 3917.62                                                                                         |
| Temperature                       | 100(2) K                                                                                        |
| Wavelength                        | 0.71069 Å                                                                                       |
| Crystal system                    | Monoclinic                                                                                      |
| Space group                       | C2/c                                                                                            |
| Unit cell dimensions              | a = 41.686(5) Å                                                                                 |
|                                   | b = 19.050(5) Å                                                                                 |
|                                   | c = 29.292(5) Å                                                                                 |
|                                   | $\alpha = 90.000(5)^\circ$                                                                      |
|                                   | $\beta = 120.028(5)^\circ$                                                                      |
|                                   | $\gamma = 90.000(5)^\circ$                                                                      |
| Volume                            | 20139(7) Å <sup>3</sup>                                                                         |
| Z                                 | 4                                                                                               |
| Density (calculated)              | 1.292 Mg/m <sup>3</sup>                                                                         |
| Absorption coefficient            | 4.002 mm <sup>-1</sup>                                                                          |
| F(000)                            | 7412                                                                                            |
| Crystal size                      | 0.32 x 0.15 x 0.03 mm <sup>3</sup>                                                              |
| Theta range for data collection   | 1.13 to 21.00°                                                                                  |
| Index ranges                      | -40 ≤ h ≤ 41, -15 ≤ k ≤ 19, -29 ≤ l ≤ 29                                                        |
| Reflections collected             | 26188                                                                                           |
| Independent reflections           | 10488 [R(int) = 0.0612]                                                                         |
| Completeness to theta = 21.00°    | 97.0 %                                                                                          |
| Absorption correction             | Semi-empirical from equivalents                                                                 |
| Max. and min. transmission        | 0.8894 and 0.3607                                                                               |
| Refinement method                 | Full-matrix least-squares on F <sup>2</sup>                                                     |
| Data / restraints / parameters    | 10488 / 65 / 439                                                                                |
| Goodness-of-fit on F <sup>2</sup> | 1.120                                                                                           |
| Final R indices [I > 2σ(I)]       | R1 = 0.1283, wR2 = 0.3172                                                                       |
| R indices (all data)              | R1 = 0.1456, wR2 = 0.3339                                                                       |
| Largest diff. peak and hole       | 11.508 and -2.216 e.Å <sup>-3</sup>                                                             |

**Table S3** Detailed structure parameters for **1**

| Metal center |            |                        | Metal center |              |            |
|--------------|------------|------------------------|--------------|--------------|------------|
| W1           | W-C        | 2.09-2.20Å             | Mn6          | Mn-N23       | 2.20(2)Å   |
|              | C-N        | 1.12-1.21Å             |              | Mn-N16       | 2.17(3)Å   |
|              | W-C-N      | 174-178°               |              | Mn-N26       | 2.23(3)Å   |
| W2           | W-C        | 2.11-2.18Å             |              | Mn-N36       | 2.18(2)Å   |
|              | C-N        | 1.12-1.24Å             |              | Mn-N621      | 2.27(2)Å   |
|              | W-C-N      | 171-178°               |              | Mn-N611      | 2.27(2)Å   |
| W3           | W-C        | 2.14-2.19Å             |              | Mn-N23-C23   | 165(2)°    |
|              | C-N        | 1.10-1.34Å             |              | Mn-N16-C16   | 177(2)°    |
|              | W-C-N      | 171-178°               |              | Mn-N26-C26   | 171(2)°    |
| Mn4          | Mn-N14     | 2.21(3)Å               |              | Mn-N36-C36   | 169(2)°    |
|              | Mn-N24     | 2.19(3)Å               |              | N23-Mn-N16   | 90.7(9)°   |
|              | Mn-N34     | 2.23(2)Å               |              | N23-Mn-N26   | 100.4(9)°  |
|              | Mn-N14-C14 | 169(3)°                |              | N23-Mn-N36   | 86.7(9)°   |
|              | Mn-N24-C24 | 168(3)°                |              | N23-Mn-N611  | 89.2(9)°   |
|              | Mn-N34-C34 | 166(2)°                |              | N23-Mn-N611  | 87.0(9)°   |
|              | N14-Mn-N14 | 180.0(5)°              |              | N16-Mn-N26   | 92.4(9)°   |
|              | N24-Mn-N24 | 180.0(9)°              |              | N16-Mn-N36   | 88.4(9)°   |
|              | N34-Mn-N34 | 180.0(14)°             |              | N16-Mn-N611  | 179.5(12)° |
|              | N14-Mn-N24 | 86.1(10)°<br>93.9(10)° |              | N16-Mn-N621  | 89.6(9)°   |
|              | N24-Mn-N34 | 88.9(9)°<br>91.9(9)°   |              | N26-Mn-N36   | 86.7(9)°   |
|              | N34-Mn-N14 | 89.6(9)°               |              | N26-Mn-N611  | 88.2(10)°  |
|              |            |                        |              | N26-Mn-N621  | 172.4(9)°  |
|              |            |                        |              | N36-Mn-N611  | 91.7(9)°   |
|              |            |                        |              | N36-Mn-N621  | 86.0(9)°   |
|              |            |                        |              | N621-Mn-N611 | 89.9(10)°  |

|     |             |            |     |             |            |
|-----|-------------|------------|-----|-------------|------------|
|     |             | 90.4(9) °  |     |             |            |
| Mn5 | Mn-N11      | 2.21(2)Å   | Mn7 | Mn-N17      | 2.18(3)Å   |
|     | Mn-N15      | 2.23(3)Å   |     | Mn-N27      | 2.19(3)Å   |
|     | Mn-N25      | 2.21(3)Å   |     | Mn-N37      | 2.21(3)Å   |
|     | Mn-N35      | 2.263(15)Å |     | Mn-N711     | 2.25(2)Å   |
|     | Mn-N511     | 2.29(3)Å   |     | Mn-O71      | 2.18(3)Å   |
|     | Mn-N521     | 2.29(2)Å   |     | Mn-O72      | 2.14(3)Å   |
|     | Mn-N11-C11  | 167(2)°    |     | Mn-N17-C17  | 174(3)°    |
|     | Mn-N15-C15  | 176(2)°    |     | Mn-N27-C27  | 170(2)°    |
|     | Mn-N25-C25  | 172(3)°    |     | Mn-N37-C37  | 164(3)°    |
|     | Mn-N35-C35  | 145(3)°    |     | N17-Mn-N27  | 94.4(10)°  |
|     | N11-Mn-N15  | 103.7(9)°  |     | N17-Mn-N37  | 91.3(11)°  |
|     | N11-Mn-N25  | 87.8(9)°   |     | N17-Mn-N711 | 87.4(10)°  |
|     | N11-Mn-N35  | 166.9(11)° |     | N17-Mn-O71  | 86.0(11)°  |
|     | N11-Mn-N521 | 88.6(8)°   |     | N17-Mn-O72  | 176.9(12)° |
|     | N11-Mn-N511 | 85.7(9)°   |     | N27-Mn-N37  | 94.0(11)°  |
|     | N15-Mn-N25  | 94.1(10)°  |     | N27-Mn-N711 | 88.1(10)°  |
|     | N15-Mn-N35  | 85,4(11)°  |     | N27-Mn-O71  | 175.2(11)° |
|     | N15-Mn-N521 | 87.0(9)°   |     | N27-Mn-O72  | 88.7(11)°  |
|     | N15-Mn-N511 | 168.4(10)° |     | N37-Mn-N711 | 177.6(11)° |
|     | N25-Mn-N35  | 82.1(11)°  |     | N37-Mn-O71  | 90.8(11)°  |
|     | N25-Mn-N521 | 176.4(9)°  |     | N37-Mn-O72  | 88.2(12)°  |
|     | N25-Mn-N511 | 92.9(10)°  |     | N711-Mn-O71 | 87.2(11)°  |



|     |              |            |     |             |            |
|-----|--------------|------------|-----|-------------|------------|
|     | N35-Mn-N521  | 101.4(11)° |     | N711-Mn-O72 | 92.9(11)°  |
|     | N35-Mn-N511  | 86.5(12)°  |     | O71-Mn-O72  | 91.0(12)°  |
|     | N521-Mn-N511 | 86.5(10)°  |     |             |            |
| Mn8 | Mn-N18       | 2.22(3)Å   | Mn8 | N18-Mn-N28  | 90.5(10)°  |
|     | Mn-N28       | 2.16(3)Å   |     | N18-Mn-N38  | 97.4(10)°  |
|     | Mn-N38       | 2.21(3)Å   |     | N18-Mn-O82  | 89.9(11)°  |
| Mn8 | Mn-O82       | 2.18(3)Å   | Mn8 | N18-Mn-O83  | 176.5(12)° |
|     | Mn-O83       | 2.24(4)Å   |     | N18-Mn-O84  | 93.7(13)°  |
|     | Mn-O84       | 2.23(4)Å   |     | N28-Mn-N38  | 95.6(11)°  |
|     | Mn-N18-C18   | 163(2)°    |     | N28-Mn-O82  | 174.5(12)° |
|     | Mn-N28-C28   | 171(3)°    |     | N28-Mn-O83  | 90.2(12)°  |
|     | Mn-N38-C38   | 174(3)°    |     | N28-Mn-O84  | 90.4(13)°  |
|     |              |            |     | N38-Mn-O82  | 89.8(11)°  |
|     |              |            |     | N38-Mn-O83  | 85.9(12)°  |
|     |              |            |     | N38-Mn-O84  | 167.2(13)° |
|     |              |            |     | O82-Mn-O83  | 89.1(13)°  |
|     |              |            |     | O82-Mn-O84  | 84.1(14)°  |
|     |              |            |     | O83-Mn-O84  | 82.8(14)°  |

Figure 1 consists of three ORTEP diagrams of the Mn<sub>3</sub>W<sub>3</sub> complex. (a) shows the Mn<sub>3</sub>W<sub>3</sub> complex with thermal ellipsoids at the 50% probability level. (b) shows the Mn<sub>3</sub>W<sub>3</sub> complex with thermal ellipsoids at the 50% probability level. (c) shows the Mn<sub>3</sub>W<sub>3</sub> complex with thermal ellipsoids at the 50% probability level.

10

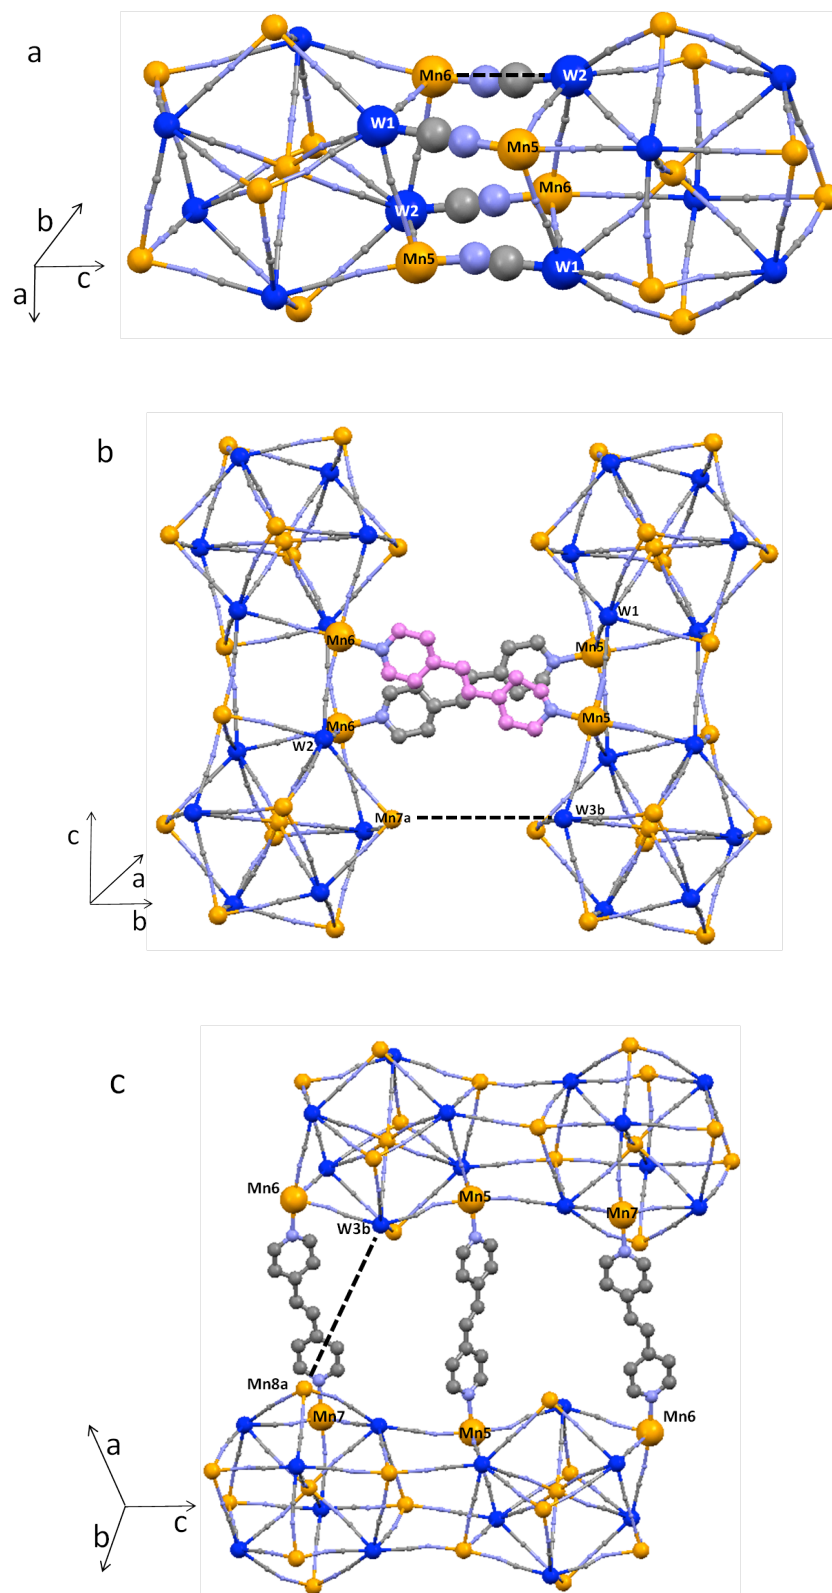

**Figure S3.** Intercluster contacts between  $\{Mn_9W_6\}$  units. Dotted line illustrate the closest intermolecular contacts in the directions orthogonal to the direction  $c$  of  $\{Mn_9W_6\}_4$  nanowire.

## 5. Magnetic properties of **1a**

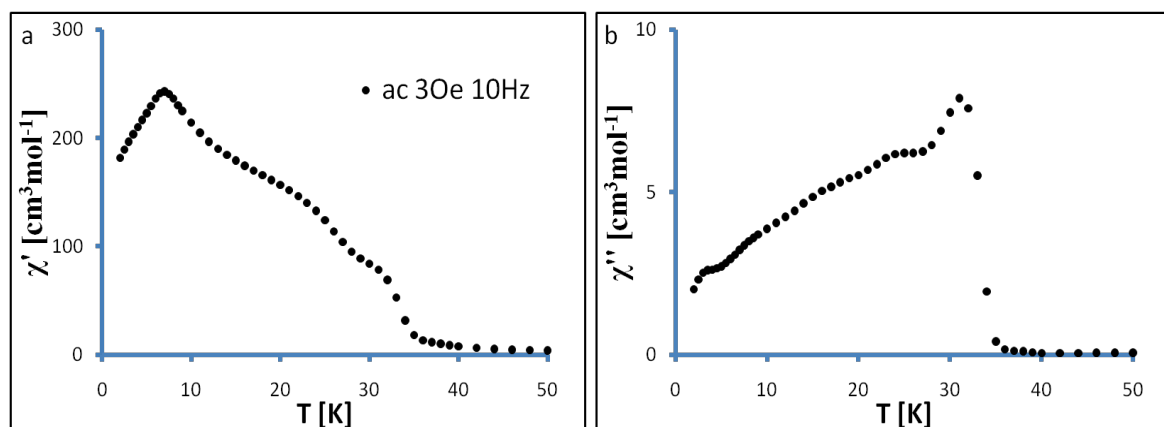

**Figure S4.** *ac*  $\chi'(T)$  (a) and  $\chi''(T)$  (b) susceptibility curves for sample **1a** measured at  $H_{ac}=3$  Oe,  $f=10$  Hz.
